# Supplementary material for: Life under COVID-19 for LGBT+ people in the UK: systematic review of UK research on the impact of COVID-19 on sexual and gender minority populations
Source: HighWire-hosted journal article supplement (doi:10.1136/bmjopen-2021-050092), 2021-07-01

## Online supplement

Title: Life under Covid-19 for LGBT+ people in the UK: Systematic review of UK research on the impact of COVID-19 on sexual and gender minority populations

Authors Victoria J McGowan, Hayley J Lowther, Catherine Meads

### Contents:

Online Supplement Table W1. Search terms

Online Supplement Table W2. List of excluded studies and reasons for exclusion

Online Supplement Table W3. Quality checklist results (using Joanna Briggs Institute checklist for cross-sectional studies)

Online Supplement Table W4. Results from Kneale & Becares Queerantime Study

Online Supplement Figure 1. PRISMA flow diagram

Online Supplement Table W1. Database searches

| Database (platform)                 | Date                                  | Search terms                                                                                                                                                                                                                                                                                                                                                                                                                                                                              |
|-------------------------------------|---------------------------------------|-------------------------------------------------------------------------------------------------------------------------------------------------------------------------------------------------------------------------------------------------------------------------------------------------------------------------------------------------------------------------------------------------------------------------------------------------------------------------------------------|
| Cinahl Plus (EBSCO)                 | 2019 - 26th Nov 2020                  | homosexuality or gay or lesbian or bisexual or queer or transgender AND covid-19 or coronavirus or 2019-ncov or sars-cov-2 or cov-19                                                                                                                                                                                                                                                                                                                                                      |
| Cochrane Central (Cochrane Library) | 2020 - 10 <sup>th</sup> December 2020 | covid or coronavirus in Title Abstract Keyword AND "sexual orientation" or "gender identity" or lesbian or bisexual or gay or transgender or "sexual minority" in Title Abstract Keyword                                                                                                                                                                                                                                                                                                  |
| Core collection (Web of Science)    | 1970 - 10 <sup>th</sup> Dec 2020      | (sexual orientation) or (gender identity) or lgbt or lgb or lesbian or bisexual or gay AND covid or coronavirus                                                                                                                                                                                                                                                                                                                                                                           |
| Embase (Ovid)                       | 1974 - 2020 November 25               | 1 homosexuality.mp. or homosexuality/ (25311)<br>2 homosexual.mp. (17847)<br>3 sexual orientation/ or gender identity/ (21917)<br>4 lesbian.mp. or homosexual female/ (8526)<br>5 bisexual.mp. or bisexuality/ (12325)<br>6 transsexualism/ or gender dysphoria/ (5637)<br>7 transgender/ or transgender.mp. (10197)<br>8 queer.mp. (1524)<br>9 pansexual.mp. (67)<br>10 1 or 2 or 3 or 4 or 5 or 6 or 7 or 8 or 9 (67482)<br>11 Coronavirinae/ or covid.mp. (69060)<br>12 10 and 11 (66) |
| Medline (Ovid)                      | 1946 - November 25, 2020              | 1 homosexuality.mp. or homosexuality/ (31121)<br>2 homosexual.mp. (9492)<br>3 sexual orientation/ or gender identity/ (73957)<br>4 lesbian.mp. or homosexual female/ (6343)<br>5 bisexual.mp. or bisexuality/ (10306)<br>6 transsexualism/ or gender dysphoria/ (4209)<br>7 transgender/ or transgender.mp. (7406)<br>8 queer.mp. (1399)<br>9 pansexual.mp. (56)<br>10 1 or 2 or 3 or 4 or 5 or 6 or 7 or 8 or 9 (109868)<br>11 Coronavirinae/ or covid.mp. (75174)<br>12 10 and 11 (99)  |
| Scopus (Scopus platform)            | 2020 - 10 <sup>th</sup> December 2020 | covid or coronavirus AND "sexual orientation" or "gender identity" or lesbian or bisexual or gay or transgender or "sexual minority"                                                                                                                                                                                                                                                                                                                                                      |

Online Supplement Table W2. Excluded studies and reasons for exclusion

| No | Reference                                                                                                                                                                                                                                                                                       | Reason                                                 |
|----|-------------------------------------------------------------------------------------------------------------------------------------------------------------------------------------------------------------------------------------------------------------------------------------------------|--------------------------------------------------------|
| 1  | Gahan L, Almack K. Experiences of and responses to disempowerment, violence, and injustice within the relational lives of lesbian, gay, bisexual, transgender, and queer people. JOURNAL OF SOCIOLOGY 2020. DOI: 10.1177/1440783320958812 Early Access Date: OCT 2020                           | Editorial                                              |
| 2  | Rosa WE, Shook A, Acquaviva KD. LGBTQ+ Inclusive Palliative Care in the Context of COVID-19: Pragmatic Recommendations for Clinicians. Journal of Pain and Symptom Management 2020;60:e44ee47                                                                                                   | Not UK-based                                           |
| 3  | COVID-19 & Older LGBT+ people, see <a href="https://covid19olderlgbt.wordpress.com/">https://covid19olderlgbt.wordpress.com/</a>                                                                                                                                                                | Study ongoing                                          |
| 4  | Galop, see <a href="http://www.galop.org.uk/a-new-survey-to-better-understand-how-covid-19-lockdown-restrictions-impacted-relationships/">http://www.galop.org.uk/a-new-survey-to-better-understand-how-covid-19-lockdown-restrictions-impacted-relationships/</a>                              | Study ongoing                                          |
| 5  | NatCen, see <a href="https://natcen.ac.uk/news-media/press-releases/2020/december/natcen-to-investigate-impacts-of-covid-19-on-uk-lgbtplus-communities/">https://natcen.ac.uk/news-media/press-releases/2020/december/natcen-to-investigate-impacts-of-covid-19-on-uk-lgbtplus-communities/</a> | Study ongoing                                          |
| 6  | Queer Voices Heard, see <a href="https://www.gaytimes.co.uk/life/57-of-lgbtq-people-think-their-lives-will-be-worse-off-in-six-months-due-to-coronavirus/">https://www.gaytimes.co.uk/life/57-of-lgbtq-people-think-their-lives-will-be-worse-off-in-six-months-due-to-coronavirus/</a>         | Insufficient results, no numbers of participants given |

Online Supplement Table W3. Quality checklist results (using Joanna Briggs Institute checklist for cross-sectional studies)

| Source organisation/<br>team (date)               | 1 | 2 | 3 | 4 | 5 | 6 | 7 | 8 | Generalisability                                                                    | Overall appraisal                                                                                                                                                                   |
|---------------------------------------------------|---|---|---|---|---|---|---|---|-------------------------------------------------------------------------------------|-------------------------------------------------------------------------------------------------------------------------------------------------------------------------------------|
| Barnardo's<br>Sept 2020                           | U | N | U | U | N | N | Y | Y | Reasonably good fit, consistent with Outlife survey results                         | Insufficient details in report to know how study done, small trans group - trans men's and women's results all put together                                                         |
| Birmingham LGBT<br>(Sept 2020)                    | Y | N | U | U | N | N | Y | Y | Reasonably good fit, consistent with the other non-comparative surveys              | Part of a broader project commissioned by the Public Health Division of Birmingham City Council – unclear where these results are                                                   |
| Healthwatch Together<br>(June/July 2020)          | Y | N | U | U | N | N | Y | N | Reasonably good fit, consistent with the other non-comparative surveys              | Comparator includes small LGBT group within it, with the LGBT group also written up separately                                                                                      |
| Houghton and Tasker<br>(Aug 2020)                 | N | N | U | U | N | N | Y | Y | Reasonably good fit, consistent with the other non-comparative surveys              | Preliminary results only, no comparator, demographics covers most PROGRESS+ Factors                                                                                                 |
| Kneale & Becares<br>(Aug 2020)                    | Y | Y | U | Y | Y | Y | Y | Y | Reasonably good fit, consistent with the other non-comparative surveys              | Detailed methods section, preliminary results only, no comparator, no demographics to assess variation within/between LGBT+ (ie intersectional approaches).                         |
| Lancashire LGBT<br>(July 2020)                    | U | N | U | U | N | N | Y | Y | Reasonably good fit, consistent with the other non-comparative surveys              | Insufficient details in report to know how study done, no comparator, no demographics                                                                                               |
| LGBT Foundation<br>(May 2020)                     | U | N | U | U | N | N | U | Y | Reasonably good fit, consistent with the other non-comparative surveys              | Insufficient details in report to know how study done, no comparator, some demographics – no SES indicators.                                                                        |
| LGBT South West,<br>Intercom Trust<br>(July 2020) | N | N | U | U | N | N | U | Y | Reasonably good fit, consistent with the other non-comparative surveys              | No methods section, no comparator, , no demographics beyond sexual orientation and gender identity.                                                                                 |
| Live Through This<br>(Aug 2020)                   | Y | N | U | U | N | N | Y | Y | Reasonably good fit, but this is the only work of its kind in this population group | Insufficient details in report to know how study done, interesting limitations section – acknowledges intersectional effects, no comparator, some demographics – no SES indicators. |

|                                                                                                                                                                                                                                                                                                                                                                                                                                                                                                                                                                                                                                                                                                                               |   |   |   |   |   |   |   |   |                                                                                      |                                                                                                               |
|-------------------------------------------------------------------------------------------------------------------------------------------------------------------------------------------------------------------------------------------------------------------------------------------------------------------------------------------------------------------------------------------------------------------------------------------------------------------------------------------------------------------------------------------------------------------------------------------------------------------------------------------------------------------------------------------------------------------------------|---|---|---|---|---|---|---|---|--------------------------------------------------------------------------------------|---------------------------------------------------------------------------------------------------------------|
| Opening Doors<br>London<br>(Nov 2020)                                                                                                                                                                                                                                                                                                                                                                                                                                                                                                                                                                                                                                                                                         | Y | N | U | U | N | N | U | Y | Better than most, as telephone used for non-digitally competent members of community | Insufficient details in report to know how study done, no comparator                                          |
| Outlife<br>(June 2020)                                                                                                                                                                                                                                                                                                                                                                                                                                                                                                                                                                                                                                                                                                        | N | N | U | U | N | N | Y | Y | Reasonably good fit, but this is the only work of its kind in this population group  | Largest survey, small heterosexual comparator group, very detailed results given, no methods or demographics. |
| <p>Questions: 1. Were the criteria for inclusion in the sample clearly defined?, 2. Were the study subjects and the setting described in detail?, 3. Was the exposure measured in a valid and reliable way?, 4. Were objective, standard criteria used for measurement of the condition?, 5. Were confounding factors identified?, 6. Were strategies to deal with confounding factors stated?, 7. Were the outcomes measured in a valid and reliable way?, 8. Was appropriate statistical analysis used?</p> <p>Generalisability – summary of: Can the results be applied to the local population? Do the results of this study fit with other available evidence? What are the implications of this study for practice?</p> |   |   |   |   |   |   |   |   |                                                                                      |                                                                                                               |

Online Supplement Table W4. Results from Kneale &amp; Becares Queerantime Study

| Outcome                                                        | Metric     | Total      | Cis female Gay/Lesbian | Cis female bisexual/ other/ don't know/ prefer not to say | Cis male Gay | Cis male bisexual/ other/don't know/ prefer not to say | Trans-gender and Gender Diverse |
|----------------------------------------------------------------|------------|------------|------------------------|-----------------------------------------------------------|--------------|--------------------------------------------------------|---------------------------------|
| Perceived Stress Scale (4-items)                               | Mean (SD)  | 7.7 (3.2)  | 6.4 (3.2)              | 8.3 (3.1)                                                 | 7.0 (3.0)    | 9.0 (3.4)                                              | 9.0 (3.0)                       |
| Center for Epidemiological Studies Depression Scale (10-items) | Mean (SD)  | 14.2 (6.9) | 12.0 (6.6)             | 15.0 (5.9)                                                | 12.7 (7.2)   | 16.1 (7.5)                                             | 17.1 (6.6)                      |
| Evidence of depressive symptomology ( $\geq 10$ )              | Percentage | 71.9       | 63.4                   | 81.7                                                      | 61.3         | 84.6                                                   | 83.6                            |
| Harassment or inappropriate incidents reported                 | Percentage | 16.7       | 19.7                   | 13.3                                                      | 7.5          | 15.4                                                   | 28.8                            |
| Change in perceived social status - negative                   | Percentage | 27.6       | 25.3                   | 26.7                                                      | 23.7         | 23.1                                                   | 37.0                            |
| Change in perceived social status - positive                   | Percentage | 25.4       | 22.5                   | 30.0                                                      | 24.7         | 15.4                                                   | 27.4                            |

Online Supplement **Figure 1**. PRISMA flow diagram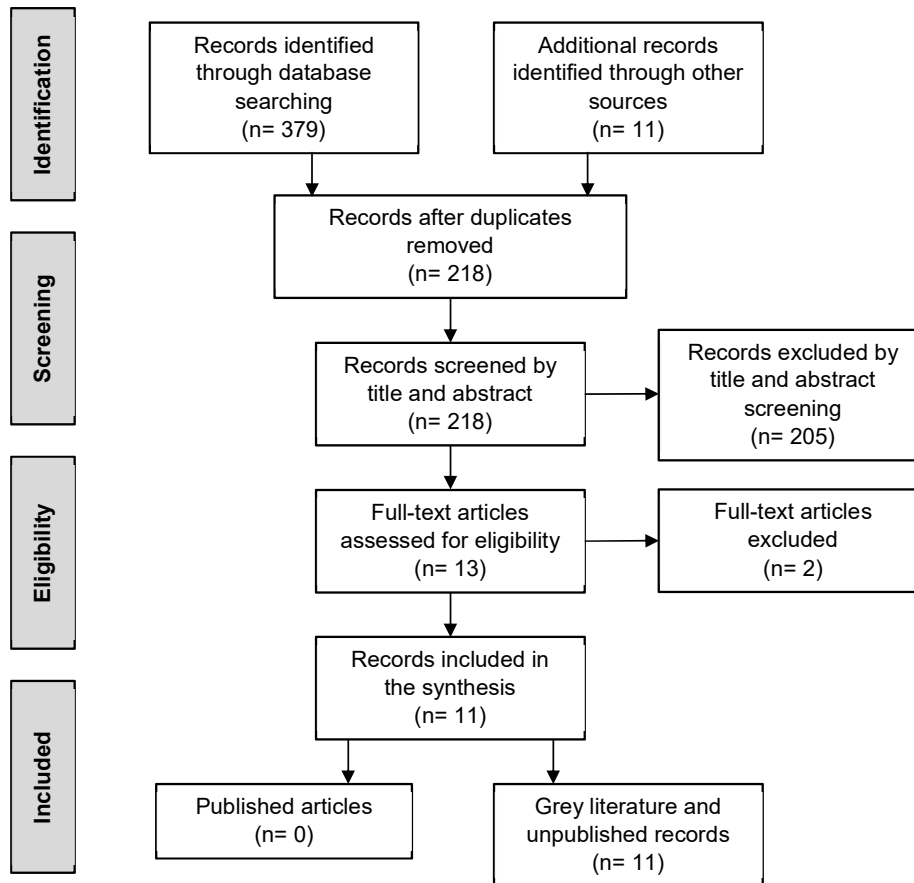

Supplement: bmjopen-2021-050092supp001_data_supplement.pdf [file bmjopen-2021-050092supp001_data_supplement.pdf]
